# Supplementary material for: Development of an UPLC-MS/MS Method for the Analysis of Mycotoxins in Rumen Fluid with and without Maize Silage Emphasizes the Importance of Using Matrix-Matched Calibration
Source: PubMed Central journal article supplement (PMC6784025; doi:10.3390/toxins11090519), 2019-09-07
Supplement: toxins-11-00519-s001.pdf [file toxins-11-00519-s001.pdf]

# Supplementary Materials: Development of an UPLC-MS/MS Method for the Analysis of Mycotoxins in Rumen Fluid with and without Maize Silage Emphasizes the Importance of Using Matrix-Matched Calibration

Sandra Debevere, Siegrid De Baere, Geert Haesaert, Michael Rychlik, Veerle Fievez and Siska Croubels

**Table S1.** Mycotoxins found in maize samples in Belgium (Vandicke J. (Department of Plants and Crops, Faculty of Bioscience Engineering, Ghent, Belgium). Personal communication, 2017).

| Mycotoxins in Maize    |        | 2016<br>(91 Samples)             |                                        |
|------------------------|--------|----------------------------------|----------------------------------------|
|                        |        | Prevalence<br>(% of all samples) | % samples exceeding<br>EU Regulation * |
| Nivalenol              | NIV    | 98.9                             | /                                      |
| Deoxynivalenol         | DON    | 92.3                             | 2                                      |
| Zearalenone            | ZEN    | 64.8                             | 1                                      |
| EnniatinB              | ENN B  | 42.9                             | /                                      |
| Diacetoxyscirpenol     | DAS    | 11.0                             | /                                      |
| Fumonisin B1           | FB1    | 2.5                              | 0                                      |
| Alternariolmethylether | AME    | 2.2                              | /                                      |
| T-2 toxin              | T-2    | 1.1                              | 0                                      |
| Sterigmatocystin       | STERIG | 1.1                              | /                                      |
| Alternariol            | AOH    | 0                                | /                                      |
| Fumonisin B2           | FB2    | 0                                | 0                                      |
| Fumonisin B3           | FB3    | 0                                | 0                                      |
| Fusarenon-X            | FX     | 0                                | /                                      |
| Roquefortin C          | ROQ-C  | 0                                | /                                      |

0% incidence: neosolaniol (NEO), aflatoxin B2 (AFB2), AFB1, HT-2 toxin (HT2), ochratoxin A (OTA) \* European Commission Commission Recommendation No 2006/576/EC of 17 August 2006 on the presence of deoxynivalenol, zearalenone, ochratoxin A, T-2 and HT-2 and fumonisins in products intended for animal feeding. Off. J. Eur. Union 2006, L229, 7–9. When no number is mentioned (/), no EU regulation exists for this mycotoxin.

Table S2. Mycotoxins found in silage samples in Europe.

| Mycotoxins in Maize Silage (21 Samples) |       | Prevalence (% of 21 Maize Silage Samples in Belgium) [1–3] |                 | Prevalence (% of 100 Silage Samples in Europe) [4] |
|-----------------------------------------|-------|------------------------------------------------------------|-----------------|----------------------------------------------------|
|                                         |       | Non-Moldy Parts                                            | Moldy Hot Spots |                                                    |
| Deoxynivalenol                          | DON   | 100                                                        | 100             | 100                                                |
| Roquefortin C                           | ROQ-C | 62                                                         | 100             | 36                                                 |
| Citrinin                                | CIT   | 95                                                         | 95              |                                                    |
| Mycophenolic acid                       | MPA   | 95                                                         | 86              |                                                    |
| Zearalenone                             | ZEN   | 90                                                         | 90              | 32                                                 |
| Enniatin B                              | ENN B | 86                                                         | 86              | 91                                                 |
| Nivalenol                               | NIV   |                                                            |                 | 64                                                 |
| HT-2 toxin                              | HT-2  | 81                                                         | 86              | 3                                                  |
| Ochratoxin A                            | OTA   | 62                                                         | 72              | 4                                                  |
| Mevalonic acid                          | MVA   | 29                                                         | 52              |                                                    |
| Patulin                                 | PAT   | 29                                                         | 38              |                                                    |
| Gliotoxin                               | GT    | 14                                                         | 0               |                                                    |
| Penitrem A                              | PA    | 0                                                          | 19              |                                                    |

## References

1. Tangni, E. K.; Pussemier, L.; Bastiaanse, H.; Haesaert, G.; Foucart, G.; Van Hove, F. Presence of mycophenolic acid, roquefortine C, citrinin and ochratoxin A in maize and grass silages supplied to dairy cattle in Belgium. *J. Anim. Sci. Adv.* **2013**, *3*, 598–612.
2. Driehuis, F.; Spanjer, M. C.; Scholten, J. M.; te Giffel, M. C. Occurrence of mycotoxins in feedstuffs of dairy cows and estimation of total dietary intakes. *J. Dairy Sci.* **2008**, *91*, 4261–4271.
3. Wambacq, E.; Vanhoutte, I.; Audenaert, K.; Gelder, L. De; Haesaert, G. Occurrence, prevention and remediation of toxigenic fungi and mycotoxins in silage: a review. *J. Sci. Food Agric.* **2016**, *96*, 2284–2302.
4. De Boevre, M. (Centre of Excellence in Mycotoxicology and Public Health, Department of Bioanalysis, Ghent, Belgium). Personal communication, 2016.
